# Supplementary material for: ACVIM consensus statement on the diagnosis and treatment of chronic hepatitis in dogs
Source: PubMed Central journal article supplement — J Vet Intern Med. 2019 Mar 7;33(3):1173–200. doi: 10.1111/jvim.15467 (PMC6524396; doi:10.1111/jvim.15467), 2019-03-07
Supplement: JVIM-33-1173-s001.pdf [file JVIM-33-1173-s001.pdf]

### **Supplement 1: Definition of Chronic Hepatitis<sup>1</sup>**

**Chronic hepatitis** is characterized by hepatocellular apoptosis or necrosis, a variable mononuclear or mixed inflammatory infiltrate, regeneration, and fibrosis. The proportion and distribution of these components vary widely and it is necessary to include in the diagnosis the activity and stage of the disease as well as the possible cause. The activity of the disease is determined by the amount of inflammation and extent of hepatocellular apoptosis and necrosis. The stage of the disease, and the prognosis, may be determined by the extent and pattern of fibrosis and the possible presence of architectural distortion. Fibrosis may be porto-portal, porto-central and centro-central bridging, or it may dissect the lobule. It may occur associated with interface hepatitis, following collapse and condensation of the reticulin network, or by direct activation of hepatic stellate cells with perisinusoidal deposition of collagen. Regeneration and regenerative nodules of hepatic parenchyma are often seen, as well as proliferation of ductular structures at the periphery of the parenchyma and within fibrous septa. Histochemical stains for connective tissue may be helpful in detecting the amount and pattern of fibrosis, particularly in early and mild disease. (Van den Ingh TS, WSAVA, 2006; Cullen et al VCNA, 2009)

**Cirrhosis** is the end stage of chronic hepatitis and is defined as a diffuse process characterized by fibrosis of the liver and the conversion of normal liver architecture into structurally abnormal nodules. In cirrhosis, two morphological categories can be distinguished, i.e. micronodular cirrhosis with nodules less than 3 mm that are all the same size, and macronodular cirrhosis with nodules greater than 3 mm that are of different sizes.

**Lobular dissecting hepatitis** is microscopically characterized by bands of fibroblasts and thin strands of extracellular matrix between individual and small groups of hepatocytes which cause dissection of the original lobular pattern. Inflammation and hepatocellular apoptosis/necrosis are slight to moderate. Marked ductular proliferation is seen as well.

**Non-specific reactive hepatitis\*** represents a nonspecific response of the liver to a wide variety of extrahepatic disease processes, especially febrile illnesses and inflammation somewhere in the splanchnic bed, or it represents the residual lesion of a previous inflammatory intrahepatic disease. The lesion is characterized by an inflammatory infiltrate in portal areas and parenchyma without evidence of necrosis/apoptosis or fibrosis.

<sup>1</sup>**van den Ingh TSGAM**, Van Winkle TJ, Cullen JM, et al. Morphological classification of parenchymal disorders of the canine and feline liver: Hepatocellular death, hepatitis, and cirrhosis ~~WSAVA (2016) for~~ **WSAVA (2016) for** Clinical and Histological Diagnosis of Canine and Feline Liver Diseases. Society of Comparative Hepatology; Available at: <http://www.vetvisuals.com/lms/moodle/mod/book/view.php?id=1001&chapterid=52859>

\*The panel prefers the term non-specific reactive hepatopathy as inflammation is only a single manifestation of the type of damage inflicted by disruption of the splanchnic circulation. Other changes include vacuolar degeneration and lipidosis.

**Supplemental Table 1: Breeds with reported increased prevalence of chronic hepatitis or breed specific type of chronic hepatitis, including age and breed predisposition and role of copper**

| Breed                     | Strength of evidence for breed related disease<br>(Groups A, B and C described below)*                                                                                                                                                                                                                                                                                                                                               | Age                                                                                             | Sex pre-disposition                                                                                                                                                                                                                                                                                                                                                            | Countries and Era                                                                                | Role of copper                                                                                                                                                                                                                                                                                                                                                                                                   |
|---------------------------|--------------------------------------------------------------------------------------------------------------------------------------------------------------------------------------------------------------------------------------------------------------------------------------------------------------------------------------------------------------------------------------------------------------------------------------|-------------------------------------------------------------------------------------------------|--------------------------------------------------------------------------------------------------------------------------------------------------------------------------------------------------------------------------------------------------------------------------------------------------------------------------------------------------------------------------------|--------------------------------------------------------------------------------------------------|------------------------------------------------------------------------------------------------------------------------------------------------------------------------------------------------------------------------------------------------------------------------------------------------------------------------------------------------------------------------------------------------------------------|
| <b>Labrador retriever</b> | <p><b>STRONG (many reports in groups A and C)</b></p> <p>Group A; <sup>1,4</sup></p> <p>Group B: Strombeck et al 1988<sup>5</sup>; Bosclair et al 2001; Schultheiss et al 2002; Raffan et al 2009 ; Favier et al 2013; Fieten et al 2014 ; Gomez-Selgas 2014<sup>6-11</sup></p> <p>Group C: Hoffman et al 2006; Shih et al 2007; Smedley et al 2009; Johnston et al 2013; Langlois et al 2013; Fieten et al 2014<sup>12-17</sup></p> | <p>Mean:<br/>5.6 to 7 yrs</p> <p>Median:<br/>8.3 to 9.3 yrs</p> <p>Ranges<br/>1.8 to 15 yrs</p> | <p><b>Strong female predominance in 6 studies from 2:1 to 4:1</b></p> <p>Andersson &amp; Sevelius 1991<sup>1</sup> ; Bexfield et al 2012; Hirose et al, 2014; Hoffman et al 2006; Smedley et al, 2009 Fieten et al 2014;<sup>3,4,12,14,17</sup></p> <p><b>No sex bias in 3 studies</b></p> <p>Shih et al 2009; Johnston et al 2013; Langlois et al 2013<sup>13,15,16</sup></p> | <p>Europe; USA; Japan. 1991-2014</p> <p>First reported in 1988 but no increase in prevalence</p> | <p><b>Copper involved in about 1/3 of cases reported in US and Netherlands</b></p> <p>Smedley et al 2009<sup>14</sup></p> <p>Hoffman et al 2006<sup>12</sup></p> <p>Poldevarart et al 2009<sup>2</sup></p> <p><b>Copper not reported in UK</b></p> <p>House et al<sup>a</sup> 2013</p> <p><b>Concurrent copper-associated proximal convoluted tubule dysfunction</b></p> <p>Langlois et al 2013<sup>16</sup></p> |

|                                       |                                                                                                                                                                                                                                                                                                                              |                                                                                                                                     |                                                                                                                                                                                                                           |                                                                                                                                                             |                                     |
|---------------------------------------|------------------------------------------------------------------------------------------------------------------------------------------------------------------------------------------------------------------------------------------------------------------------------------------------------------------------------|-------------------------------------------------------------------------------------------------------------------------------------|---------------------------------------------------------------------------------------------------------------------------------------------------------------------------------------------------------------------------|-------------------------------------------------------------------------------------------------------------------------------------------------------------|-------------------------------------|
| <p><b>American Cocker spaniel</b></p> | <p><b>STRONG (many reports in group A and one in group C)</b></p> <p>Group A: 1-4</p> <p>Group B: Sevelius et al 1994 and 1995; Bosclair et al 2001; Poldervaart et al; Strombeck et al 1988; Fuentealba et al; Schultheiss et al 2002<sup>18,19 2,5,7,20,21</sup></p> <p>Group C: Kanemoto et al JVIM 2013<sup>22</sup></p> | <p>Mean 4.6-5 yrs</p> <p>Median 5.5 yrs</p> <p>Range 1.9-11.25 yrs</p> <p>Bexfield et al<sup>3</sup> Noted ACS younger than ECS</p> | <p><b>Male predominance in 2 studies from 2.7:1 to 5:1:</b></p> <p>Andersson &amp; Sevelius 1991<sup>1</sup>; Bexfield et al 2012<sup>3</sup></p> <p><b>No sex bias in 1 study</b></p> <p>Kanemoto et al<sup>22</sup></p> | <p>Europe; USA; Japan. (1988) 1991-2014</p> <p>(first report in breed 1988 but unclear if really over-represented)</p>                                      | <p><b>Not copper associated</b></p> |
| <p><b>English Cocker spaniel</b></p>  | <p><b>STRONG (many reports in group A)</b></p> <p>Group A; Ref<sup>1-3</sup></p> <p>Group B: Sevelius et al 1994 and 1995; Favier et al 2013; Gomez-selgas 2014; Strombeck et al 1988; Fuentealba et al; Schultheiss et al 2002<sup>18,9,11,5,21,7</sup></p>                                                                 | <p>Mean 5 years</p> <p>Median 8.75 yrs</p> <p>Range 1.25- 14 years</p>                                                              | <p><b>No strong gender bias.</b></p> <p><b>Female predominance in 1 study 1.8:1</b></p> <p>Bexfield et al 2012<sup>3</sup></p> <p><b>Male bias 1 study 1.9:1</b></p> <p>Andersson &amp; Sevelius 1991<sup>1</sup></p>     | <p>Europe 1991-2012</p> <p>Whether reported in US/Canada or not depends on whether ECS or ACS in Strombeck; Fuentealba and Schultheiss<sup>5,7,21</sup></p> | <p><b>Not copper associated</b></p> |

|                                           |                                                                                                                                                                                                                                                                                                                                                                                                                                                                                                |                                                                                                                                               |                                                                                                                                                                    |                                                       |                                                                                                                                                                                                                                                                                                                                                                      |
|-------------------------------------------|------------------------------------------------------------------------------------------------------------------------------------------------------------------------------------------------------------------------------------------------------------------------------------------------------------------------------------------------------------------------------------------------------------------------------------------------------------------------------------------------|-----------------------------------------------------------------------------------------------------------------------------------------------|--------------------------------------------------------------------------------------------------------------------------------------------------------------------|-------------------------------------------------------|----------------------------------------------------------------------------------------------------------------------------------------------------------------------------------------------------------------------------------------------------------------------------------------------------------------------------------------------------------------------|
| <p><b>Doberman pinscher</b></p>           | <p><b>STRONG (many reports in groups A and C)</b></p> <p>Group A: 1,3, 6 and 7</p> <p>Group B: Sevelius et al 1994 and 1995; Bosclair et al 2001; Schultheiss et al 2002<sup>18,6,7</sup></p> <p>Group C: Johnson et al 1982<sup>23</sup>; Crawford et al 1985<sup>24</sup>; Van den Ingh et al 1988<sup>25</sup>; Mandigers 2004 and 2005<sup>26,27</sup>; Spee et al 2005;<sup>28</sup>Thornburg 1998<sup>29</sup>; Speeti et al 2003<sup>30</sup></p> <p>Dyggve et al 2010<sup>31</sup></p> | <p>Mean 5.1 yrs</p> <p>Median 4 - 5.33 yrs</p> <p>Range 2-10 yrs</p> <p>Bexfield et al<sup>3</sup> – younger than Lab, Cockers and Cairns</p> | <p><b>Strong female predominance ALL studies</b></p> <p><b>2:1 up to 25:1.</b></p>                                                                                 | <p>Europe including Scandinavia and USA 1982-2012</p> | <p><b>Copper associated in most references, &gt;60% of cases</b></p> <p>Johnson et al; Crawford et al; Van den Ingh et al; Mandigers et al 2004 and 2005; Spee et al 2005;<sup>23-28</sup></p> <p><b>Some papers particularly from Scandinavia NO copper and suggestive of immune-mediated.</b></p> <p>Speeti et al<sup>30</sup>; Dyggve et al 2010<sup>31</sup></p> |
| <p><b>West Highland white terrier</b></p> | <p><b>STRONG (Two reports in each of groups A and C)</b></p> <p>Group A: 1,2</p> <p>Group B: Sevelius et al 1994 and 1995<sup>18,19</sup>Favier et al 2013<sup>9</sup></p> <p>Fuentealba et al; Schultheiss et al 2002<sup>7,21</sup></p> <p>Group C: Thornburg et al 1996<sup>32</sup></p>                                                                                                                                                                                                    | <p>Mean 4.8 yrs (Andersson &amp; Sevelius 1991<sup>1</sup>)</p> <p>Range 2 yrs to 14 yrs (Thornburg 1996<sup>32</sup>)</p>                    | <p><b>One study female predominance 1.8:1 Thornburg 1996<sup>32</sup></b></p> <p><b>One study no sex bias</b></p> <p>Andersson &amp; Sevelius 1991<sup>1</sup></p> | <p>Europe and USA 1991-2009</p>                       | <p><b>About 20% copper associated</b></p> <p>Poldevaart et al,2009<sup>2</sup></p> <p>Thornburg et al, 1996<sup>32</sup></p>                                                                                                                                                                                                                                         |

|                                 |                                                                                                                                                                                                                                                                                                |                                                                                                                                                                                            |                                                                    |                                                                    |                                                                                                                                                                                                            |
|---------------------------------|------------------------------------------------------------------------------------------------------------------------------------------------------------------------------------------------------------------------------------------------------------------------------------------------|--------------------------------------------------------------------------------------------------------------------------------------------------------------------------------------------|--------------------------------------------------------------------|--------------------------------------------------------------------|------------------------------------------------------------------------------------------------------------------------------------------------------------------------------------------------------------|
|                                 |                                                                                                                                                                                                                                                                                                |                                                                                                                                                                                            |                                                                    |                                                                    |                                                                                                                                                                                                            |
| <b>Scottish terrier</b>         | <p><b>Moderate (one report in Group A)</b></p> <p>Group A: Andersson and Sevelius, 1994<sup>1</sup></p> <p>Group B: Fuentealba et al (1 case)</p> <p>Schultheiss et al 2002 <sup>21,7</sup></p>                                                                                                | No reports                                                                                                                                                                                 | No reports                                                         | Sweden only 1991 but single reports USA and Canada                 | Not reported                                                                                                                                                                                               |
| <b>Dalmatian</b>                | <p><b>STRONG (one report Group A and several Group C)</b></p> <p>Group A: Bexfield et al 2012<sup>3</sup></p> <p>Group B: Fuentealba et al; Schultheiss et al 2002 <sup>21,7</sup></p> <p>Group C: Napier 1996; Noaker et al 1999 ; Webb et al 2002; Cooper et al 1997 <sup>35,33,34</sup></p> | <p><b>Generally younger:</b></p> <p>Mean 6 yrs (Webb)</p> <p>Median 4 yrs 7 m (Bexfield)</p> <p>Range 2 yrs to 12 yrs (Bexfield <sup>3</sup> – sig younger than Lab, Cocker and Cairn)</p> | <p><b>Female predominance</b></p> <p>1.5:1 - 9:1</p>               | <p>USA first report one dog 1996-</p> <p>UK first report 2012+</p> | <p><b>All dogs copper associated</b></p> <p>Webb et al, 2002 <sup>33</sup></p> <p>Cooper et al, 1997 <sup>34</sup></p> <p>Napier et al, 1996 <sup>35</sup></p> <p>Noaker et al., 1999 <sup>35,36</sup></p> |
| <b>English Springer spaniel</b> | <p><b>STRONG</b></p> <p><b>(2 references group A and one group C)</b></p> <p>Group A: Bexfield et al 2012 and</p>                                                                                                                                                                              | <p><b>Tend to be younger</b></p> <p>Median 3.6 yr or 5 yrs (Bexfield 2012 and</p>                                                                                                          | <p><b>Marked female predominance</b></p> <p><b>2.4:1 - 3:1</b></p> | <p>UK only 2011 - 2014</p> <p>One dog Holland</p>                  | Not copper associated                                                                                                                                                                                      |

|                           |                                                                                                                                                                                                                                                                         |                                                                                                                                                                                                                                    |                                                                                                         |                                                                                        |                          |
|---------------------------|-------------------------------------------------------------------------------------------------------------------------------------------------------------------------------------------------------------------------------------------------------------------------|------------------------------------------------------------------------------------------------------------------------------------------------------------------------------------------------------------------------------------|---------------------------------------------------------------------------------------------------------|----------------------------------------------------------------------------------------|--------------------------|
|                           | <p>Watson et al 2010<sup>3,42</sup></p> <p>Group B: Raffan et al 2009; Favier et al 2013; Gomez-Selgas 2014<sup>8,9,11</sup></p> <p>Group C: Bexfield et al 2011<sup>42</sup></p>                                                                                       | <p>2011<sup>3,42</sup>)</p> <p>Range: 7 m to to 11 years</p> <p>Bexfield et al 2012 – sig younger than Lab; Cockers and Cairns</p>                                                                                                 |                                                                                                         |                                                                                        |                          |
| <b>Bedlington terrier</b> | <p><b>STRONG</b></p> <p>Group C: see Twedt et al 1979<sup>37</sup> Hultgren et al 1986;<sup>38</sup> Herrtage at al 1987 a and b – case report of 2 cases + 62 sub clinical cases presented to Cambridge;<sup>39,40</sup> Hardy Stevens and Stowe 1975<sup>43</sup></p> | <p><b>Mean age with CHRONIC signs 5 years (range 5-12 yrs – Twedt et a, 1979I)</b></p> <p><b>Dogs with acute hepatitis younger.</b> (Twedt et al, 1979<sup>37</sup> &lt; 6 yrs old)</p> <p>Dogs with clinical signs 2-11 years</p> | <p><b>No sex predisposition</b></p> <p>Twedt et al 1979;</p> <p>Hultgren et al 1986<sup>37,38</sup></p> | <p>First reported 1975 USA. Also publications from UK; Holland; Finland; Australia</p> | <b>Copper associated</b> |

|                            |                                                                                                                                                   |                                                           |                               |                                                   |              |
|----------------------------|---------------------------------------------------------------------------------------------------------------------------------------------------|-----------------------------------------------------------|-------------------------------|---------------------------------------------------|--------------|
|                            |                                                                                                                                                   | (Schultheis et al <sup>7</sup> )                          |                               |                                                   |              |
| <b>Miniature Schnauzer</b> | <b>MODERATE</b><br>Group A : Hirose et al, 2014 <sup>4</sup>                                                                                      | NA                                                        | NA                            | Japan 2014                                        | Not reported |
| <b>Pomeranian</b>          | <b>MODERATE</b><br>Group A: Hirose et al, 2014 <sup>4</sup>                                                                                       | NA                                                        | NA                            | Japan 2014                                        | Not reported |
| <b>Miniature Dachshund</b> | <b>MODERATE</b><br>Group A: Hirose et al, 2014 <sup>4</sup>                                                                                       | NA                                                        | NA                            | Japan 2014                                        | Not reported |
| <b>Cairn terrier</b>       | <b>MODERATE</b><br>Group A:<br>Bexfield et al, 2012 <sup>3</sup>                                                                                  | Median:<br>10 yrs<br>Range:<br>7 to 13 yrs                | <b>No sex pre-disposition</b> | UK 2012                                           | Not reported |
| <b>Great Dane</b>          | <b>MODERATE</b><br>Group A:<br>Bexfield et al, 2012 <sup>3</sup><br>Group B<br>Raffan et al 2009 <sup>8</sup><br>Bosclair et al 2001 <sup>6</sup> | Median:<br>6 ys 2 m<br>Range:<br>1 yr 2 m to<br>7 ys 11 m | <b>No sex pre-disposition</b> | UK only<br>2009- 2012<br><br>1 dog Canada<br>2001 | Not reported |
| <b>Samoyed</b>             | <b>MODERATE</b><br>Group A:<br>Bexfield et al, 2012 <sup>3</sup>                                                                                  | Median:<br>10 yrs<br>Range: 3<br>yrs 1 m to<br>11 yrs     | No sex pre-disposition        | UK 2012<br><br>1 dog USA<br>2002                  | Not reported |



|                             |                                                                                                                                                 |                                |      |                           |                       |
|-----------------------------|-------------------------------------------------------------------------------------------------------------------------------------------------|--------------------------------|------|---------------------------|-----------------------|
|                             | Group B:<br>Schultheiss et al 2002 <sup>7</sup>                                                                                                 |                                |      |                           |                       |
| <b>German pointer</b>       | <b>MODERATE</b><br>Group A :<br>Poldervaart et al, 2009 <sup>2</sup><br>Group B:<br>Favier et al 2013 <sup>9</sup>                              | NA                             | NA   | Holland 2009              | Not copper associated |
| <b>Yorkshire terrier</b>    | <b>MODERATE</b><br>One group a reference from UK (Watson et al 2011 <sup>45</sup> ) and 1 group B reference Schultheiss et al 2002 <sup>7</sup> | NA                             | NA   | UK 2010<br>1 dog USA 2002 | Not reported          |
| <b>Jack Russell terrier</b> | <b>MODERATE</b><br>Group A:<br>Watson et al 2011 <sup>45</sup>                                                                                  |                                |      | UK only 2010.             | Not reported          |
| <b>Standard poodle</b>      | <b>MODERATE</b><br>Group C :<br>Jensen et al 1999 <sup>41</sup><br>Bradley et al 2015 <sup>b</sup>                                              | Median<br>7.9 yr<br>(2.9-12.7) | None | USA 1991 and 2015         | Not reported          |

**\*Group A:** There are 6 or 7 published studies where increased prevalence of chronic hepatitis was demonstrated statistically based on comparison with some form of control population.

1. **Andersson M and Sevelius E, 1991<sup>1</sup>:** 250 cases of histopathologically confirmed chronic hepatitis one diagnostic laboratory in Sweden + 49 dogs with histopathologically confirmed CH at the Animal Hospital of Helsingborg 1984 – 1989. Control population: Swedish Kennel Club registrations 60-70% of all dogs in Sweden)
2. **Poldevaart JH, et al. 2009:<sup>2</sup>** Retrospective study of histologically confirmed hepatitis at University of Utrecht 2002-2006. 21 acute hepatitis; 67 chronic hepatitis. Control population: total clinic population

3. **Bexfield N, et al. 2012:**<sup>3</sup> 551 cases histopathologically confirmed chronic hepatitis from 6 histopathology labs in the UK 2001-2008. Control population: microchip data from one company from 2001 and 2008; 175,442 and 311,085 dogs respectively
4. **Hirose N, et al. 2014:**<sup>4</sup> 463 canine liver biopsies at Veterinary Medical Center of University of Tokyo 2006-2012. Odds ratios compared with all cases with chronic hepatitis. Some dogs were classified as cholangiohepatitis
5. **Watson PJ, et al. 2010:**<sup>44</sup> which was a post mortem study in Scotland where all liver pathology was included but breed predisposition for CH was calculated using relative risks
6. **Fuentealba C, et al. 1997:**<sup>21</sup> pathology study from Canada 34 dogs with chronic hepatitis – only one breed over-represented - Doberman pinschers accounted for 17.6% of the cases of chronic hepatitis, but only 2.6% (122/4687) of the total canine submissions.
7. **Strombeck DR, et al. 1988:**<sup>5</sup> also give some comparison with the general hospital population, but only one breed (Dobermans) had large enough numbers for the authors to consider this significant

**Group B:** Published studies describing chronic hepatitis in dogs in which breeds identified as having increased prevalence in the controlled papers described above were also represented.

**Group C:** Published studies describing a distinctive breed specific form of chronic hepatitis but which did not demonstrate an increased prevalence by reference to any control population.

## References

### Abstracts:

<sup>a</sup>House JV, Covey HL, Watson PJ. Qualitative analysis of hepatic copper accumulation in chronic hepatitis in Labrador retrievers BSAVA Congress 2008, UK

<sup>b</sup>Bradley A, Aboellail T, Cotter A, et al. Histologic scoring and clinical outcomes of hepatitis in 42 standard poodles ACVIM 2015, INDIANAPOLIS, IND

1. Andersson M, Sevelius E. Breed, sex and age distribution in dogs with chronic liver disease: a demographic study. *Journal of Small Animal Practice*. 1991;32(1):1-5.
2. Poldervaart JH, Favier RP, Penning LC, et al. Primary Hepatitis in Dogs: A Retrospective Review (2002-2006). *J Vet Intern Med*. 2009;23(1):72-80..
3. Bexfield NH, Buxton RJ, Vicek TJ, et al. Breed, age and gender distribution of dogs with chronic hepatitis in the United Kingdom. *The Veterinary Journal*. 2012;193(1):124-128.
4. Hirose N, Uchida K, Kanemoto H, Ohno K, et al. A Retrospective Histopathological Survey on Canine and Feline Liver Diseases at the

University of Tokyo between 2006 and 2012. *J Vet Med Sci.* 2014;76(7):1015-1020.

5. Strombeck DR, Miller LM, Harrold D. Effects of corticosteroid treatment on survival time in dogs with chronic hepatitis: 151 cases (1977-1985). *J Am Vet Med Assoc.* 1988;193(9):1109-1113.
6. Boisclair J, Doré M, Beauchamp G, et al. Characterization of the inflammatory infiltrate in canine chronic hepatitis. *Veterinary Pathology.* 2001;38(6):628-635. doi:10.1354/vp.38-6-628.
7. Schultheiss PC, Bedwell CL, Hamar DW, et al. Canine liver iron, copper, and zinc concentrations and association with histologic lesions. *Journal of Veterinary Diagnostic Investigation.* 2002;14(5):396-402.
8. Raffan E, McCallum A, Scase TJ, et al. Ascites is a Negative Prognostic Indicator in Chronic Hepatitis in Dogs. *J Vet Intern Med.* 2009;23(1):63-66.
9. Favier RP, Poldervaart JH, van den Ingh TSGAM, et al. A retrospective study of oral prednisolone treatment in canine chronic hepatitis. *Veterinary Quarterly.* 2013:1-8.
10. Fieten H, Biourge VC, Watson AL, et al. Nutritional management of inherited copper-associated hepatitis in the Labrador retriever. *The Veterinary Journal.* 2014;199(3):429-433.
11. Gomez Selgas A, Bexfield N, Scase TJ, et al. Total serum bilirubin as a negative prognostic factor in idiopathic canine chronic hepatitis. *Journal of Veterinary Diagnostic Investigation.* 2014;26(2):246-251.
12. Hoffmann G, Ingh TSGAM, Bode P, Rothuizen J. Copper-Associated Chronic Hepatitis in Labrador Retrievers. *J Vet Intern Med.* 2006;20(4):856-861..
13. Shih JL, Keating JH, Freeman LM, et al. Chronic Hepatitis in Labrador Retrievers: Clinical Presentation and Prognostic Factors. *J Vet Intern Med.* 2007;21(1):33-39.
14. Smedley R, Mullaney T, Rumbleha W. Copper-Associated Hepatitis in Labrador Retrievers. *Veterinary Pathology.* 2009;46(3):484-490. d
15. Johnston AN, Center, Sharon A, McDonough SP, et al. Hepatic copper concentrations in Labrador Retrievers with and without chronic hepatitis: 72 cases (1980–2010). *J Am Vet Med Assoc.* 2013;242(3):372-380.
16. Langlois DK, Smedley RC, Schall WD. Acquired Proximal Renal Tubular Dysfunction in 9 Labrador Retrievers with Copper -Associated  
Hepatitis (2006–2012). *J Vet Internal Med* 2013;27(3):491-92013.

18. Sevelius E, Andersson M, Jönsson L. Hepatic accumulation of alpha-1-antitrypsin in chronic liver disease in the dog. *J Comparative Pathology*. 1994;111(4):401-412.
19. Sevelius E. Diagnosis and prognosis of chronic hepatitis and cirrhosis in dogs. *Journal of Small Animal Practice*. 1995;36(12):521-528.
20. Boisclair J, Doré M, Beauchamp G, et al. Characterization of the inflammatory infiltrate in canine chronic hepatitis. *Veterinary Pathology*. 2001;38(6):628-635..
21. Fuentealba C, Guest S, Haywood S, et al. Chronic hepatitis: a retrospective study in 34 dogs. *Can Vet J*. 1997;38(6):365-373.
22. Kanemoto H, Sakai M, Sakamoto Y, et al. American Cocker Spaniel Chronic Hepatitis in Japan. *J Vet Intern Med*. June 2013;n/a–n/a.
23. Johnson GF, Zawie DA, Gilbertson SR, et al. Chronic active hepatitis in Doberman pinschers. *J Am Vet Med Assoc*. 1982;180(12):1438-1442.
24. Crawford MA, Schall WD, Jensen RK, et al. Chronic active hepatitis in 26 Doberman pinschers. *J Am Vet Med Assoc*. 1985;187(12):1343-1350.
25. van den Ingh TS, Rothuizen J, Cupery R. Chronic active hepatitis with cirrhosis in the Doberman pinscher. *Vet Q*. 1988;10(2):84-89.
26. Mandigers PJJ, van den Ingh TSGAM, Bode P, et al. Association between liver copper concentration and subclinical hepatitis in Doberman Pinschers. *J Vet Intern Med*. 2004;18(5):647-650.
27. Mandigers PJJ, van den Ingh TSGAM, et al. J. Improvement in liver pathology after 4 months of D-penicillamine in 5 doberman pinschers with subclinical hepatitis. *J Vet Intern Med*. 2005;19(1):40-43.
28. Spee B, Mandigers PJ, Arends B, et al. Differential expression of copper-associated and oxidative stress related proteins in a new variant of copper toxicosis in Doberman pinschers. *Comp Hepatol*. 2005;4(1):3.
29. Thornburg LP. Histomorphological and immunohistochemical studies of chronic active hepatitis in Doberman Pinschers. *Veterinary Pathology*. 1998;35(5):380-385.
30. Speeti M, Ståhls A, Meri S, et al. Upregulation of major histocompatibility complex class II antigens in hepatocytes in Doberman hepatitis. *Veterinary Immunology and Immunopathology*. 2003;96(1-2):1-12..
31. Dyggve H, Kennedy LJ, Meri S, et al. Association of Doberman hepatitis to canine major histocompatibility complex II. *Tissue Antigens*. 2010;77(1):30-35..

32. Thornburg LP, Rottinghaus G, Dennis G, et al. The relationship between hepatic copper content and morphologic changes in the liver of West Highland White Terriers. *Veterinary Pathology*. 1996;33(6):656-661.
33. Webb CB, Twedt DC, Meyer DJ. Copper-Associated Liver Disease in Dalmatians: A Review of 10 Dogs (1998-2001). *J Vet Intern Med*. 2002;16(6):665-668.
34. Cooper VL, Carlson MP, Jacobson J, et al. Hepatitis and increased copper levels in a dalmatian. *Journal of Veterinary Diagnostic Investigation*. 1997;9(2):201-203.
35. Napier P. Hepatic necrosis with toxic copper levels in a two-year-old Dalmation. *Can Vet J*. 1996;37(1):45.
36. Noaker LJ, Washabau RJ, Detrisac CJ, et al. Copper associated acute hepatic failure in a dog. *J Am Vet Med Assoc*. 1999;214(10):1502-6-1495.
37. Twedt DC, Sternlieb I, Gilbertson SR. Clinical, morphologic, and chemical studies on copper toxicosis of Bedlington Terriers. *J Am Vet Med Assoc*. 1979;175(3):269-275.
38. Hultgren BD, Stevens JB, Hardy RM. Inherited, chronic, progressive hepatic degeneration in Bedlington terriers with increased liver copper concentrations: clinical and pathologic observations and comparison with other copper-associated liver diseases. *American Journal of Veterinary Research*. 1986;47(2):365-377.
39. Herrtage ME, Seymour CA, Jefferies AR, et al. Inherited copper toxicosis in the Bedlington terrier: a report of two clinical cases. *Journal of Small Animal Practice*. 1987;28(12):1127-1140.
40. Herrtage ME, Seymour CA, White R, et al. Inherited copper toxicosis in the Bedlington terrier: the prevalence in asymptomatic dogs. *J Small Anim Pract*. 1987;28(12):1141-1151.
41. Jensen AL, Nielsen OL. Chronic hepatitis in three young standard poodles. *Zentralbl Veterinarmed A*. 1991;38(3):194-197.
42. Bexfield NH, Andres-Abdo C, Scase TJ, et al. Chronic hepatitis in the English springer spaniel: clinical presentation, histological description and outcome. *Vet Rec*. 2011;169(16):415.
43. Hardy R M, Stevens J B & Stowe C M (1975) *Minnesota Veterinarian* 15, 13
44. Watson PJ, Roulois AJ, Scase TJ, et al. Prevalence of hepatic lesions at post-mortem examination in dogs and association with pancreatitis. *J Small Anim Pract*. 2010;51(11):566-72.

**Supplemental Table 2: Comparison of different hepatic biopsy techniques**

| <b>Technique/Characteristic:</b> | <b>Percutaneous ultrasound guided needle biopsy</b>                                                                                                                                                                                                                                   | <b>Laparoscopic biopsy using biopsy forceps</b>                                                                                                                                                                                                                   | <b>Surgical biopsy during laparotomy</b>                                                              |
|----------------------------------|---------------------------------------------------------------------------------------------------------------------------------------------------------------------------------------------------------------------------------------------------------------------------------------|-------------------------------------------------------------------------------------------------------------------------------------------------------------------------------------------------------------------------------------------------------------------|-------------------------------------------------------------------------------------------------------|
| Invasiveness                     | <ul style="list-style-type: none"> <li>- Least invasive</li> <li>- Minimal pain</li> </ul>                                                                                                                                                                                            | <ul style="list-style-type: none"> <li>- Less invasive than surgery</li> <li>- Requires pain medication</li> </ul>                                                                                                                                                | <ul style="list-style-type: none"> <li>- Most invasive</li> <li>- Requires pain medication</li> </ul> |
| Sedation/anesthesia              | <ul style="list-style-type: none"> <li>- Requires heavy sedation/short anesthesia</li> </ul>                                                                                                                                                                                          | <ul style="list-style-type: none"> <li>- General anesthesia</li> </ul>                                                                                                                                                                                            | <ul style="list-style-type: none"> <li>- General anesthesia</li> </ul>                                |
| Adequacy of samples              | <ul style="list-style-type: none"> <li>- Poor to adequate</li> <li>- Depends on needle gauge</li> <li>- Only 2-4 portal tracts with 18 G                             <ul style="list-style-type: none"> <li>o 16 G: less than 42% had &gt; 6 portal tracts (V)</li> </ul> </li> </ul> | <ul style="list-style-type: none"> <li>- Typically adequate.</li> <li>- Using 5 mm forceps, mean of 16-18 and 8-13 portal triads per biopsy                             <ul style="list-style-type: none"> <li>o Only 3.4 (2.7-4.2) in one</li> </ul> </li> </ul> | <ul style="list-style-type: none"> <li>- Typically adequate</li> <li>- &gt;30 per biopsy</li> </ul>   |

|                                |                                                                                                                                                                                                                                                                                            |             |             |
|--------------------------------|--------------------------------------------------------------------------------------------------------------------------------------------------------------------------------------------------------------------------------------------------------------------------------------------|-------------|-------------|
|                                | <ul style="list-style-type: none"> <li>- Fragmented especially with fibrotic livers</li> <li>- Small livers may be difficult to biopsy</li> <li>- Typically biopsies from L lateral and L medial lobe only</li> <li>- Recommend 14G in most dogs, 16G in small dogs (&lt;12 kg)</li> </ul> | study       |             |
| Number and location of samples | - Limited, especially in small livers                                                                                                                                                                                                                                                      | - Unlimited | - Unlimited |

|                                       |                                                                                                                                                                                                      |                                                                                                                                                                                                                                               |                                                                                                                                                                                                |
|---------------------------------------|------------------------------------------------------------------------------------------------------------------------------------------------------------------------------------------------------|-----------------------------------------------------------------------------------------------------------------------------------------------------------------------------------------------------------------------------------------------|------------------------------------------------------------------------------------------------------------------------------------------------------------------------------------------------|
| Recognition and control of hemorrhage | <ul style="list-style-type: none"> <li>- No direct visualization, rely on post-procedural imaging (US) and monitoring of clinical status and PCV, TS</li> <li>- Highest risk for bleeding</li> </ul> | <ul style="list-style-type: none"> <li>- Direct visualization of bleeding, with control of hemorrhage through application of electrocautery or topical coagulation agents (e.g., Gelfoam<sup>®</sup>, Pfizer, NY, NY) if necessary</li> </ul> | <ul style="list-style-type: none"> <li>- Direct visualization of bleeding with electrocautery or application of topical coagulation agents (e.g., Gelfoam<sup>®</sup>) if necessary</li> </ul> |
| Cost                                  | <ul style="list-style-type: none"> <li>- Least expensive</li> </ul>                                                                                                                                  | <ul style="list-style-type: none"> <li>- Intermediate expense</li> </ul>                                                                                                                                                                      | <ul style="list-style-type: none"> <li>- Most expensive in some locations</li> </ul>                                                                                                           |
| Availability                          | <ul style="list-style-type: none"> <li>- Many practices have access to ultrasound</li> </ul>                                                                                                         | <ul style="list-style-type: none"> <li>- Requires specialized equipment and training</li> </ul>                                                                                                                                               | <ul style="list-style-type: none"> <li>- No specialized equipment or training necessary beyond sound surgical skills</li> </ul>                                                                |
| Post procedure                        | <ul style="list-style-type: none"> <li>- +/- pain medications</li> </ul>                                                                                                                             | <ul style="list-style-type: none"> <li>- Pain medications</li> </ul>                                                                                                                                                                          | <ul style="list-style-type: none"> <li>- Pain medication</li> </ul>                                                                                                                            |



|                                                    |                                                                                                                                                                                                                                                      |                                                                                                                                                                                                                       |                                                                                                                                                                                                             |
|----------------------------------------------------|------------------------------------------------------------------------------------------------------------------------------------------------------------------------------------------------------------------------------------------------------|-----------------------------------------------------------------------------------------------------------------------------------------------------------------------------------------------------------------------|-------------------------------------------------------------------------------------------------------------------------------------------------------------------------------------------------------------|
| monitoring/care                                    | <ul style="list-style-type: none"> <li>- PCV, TS, HR, RR, CRT, BP q 2 hrs for 6-8 hr</li> <li>- Monitoring at home or in hospital for up to 24 hrs</li> </ul>                                                                                        | <ul style="list-style-type: none"> <li>- Same day discharge or overnight stay depending on case</li> <li>- HR, RR, CRT, PCV, TS, BP (usually q 2 hrs for 6-8 hr)</li> </ul>                                           | <ul style="list-style-type: none"> <li>- Monitor in hospital for 24 hr</li> <li>- HR, RR, CRT, PCV, TS, BP (usually q 2 hrs for 6-8 hr)</li> </ul>                                                          |
| Time to Complete                                   | <ul style="list-style-type: none"> <li>- 10 to 15 minutes</li> </ul>                                                                                                                                                                                 | <ul style="list-style-type: none"> <li>- 35 min (13-60 min) depending on skill</li> </ul>                                                                                                                             | <ul style="list-style-type: none"> <li>- Varies with surgeon's skill</li> </ul>                                                                                                                             |
| Complication Rate                                  | <ul style="list-style-type: none"> <li>- 1.9%, 2.4%, 4.3%</li> </ul>                                                                                                                                                                                 | <ul style="list-style-type: none"> <li>- 1.9% and 3.4%</li> </ul>                                                                                                                                                     | <ul style="list-style-type: none"> <li>- Undocumented</li> </ul>                                                                                                                                            |
| Ability for further assessment and/or intervention | <ul style="list-style-type: none"> <li>- Ultrasound used to image the biliary tree and pancreas</li> <li>- No ability for therapeutic interventions</li> <li>- Can safely obtain bile by cholecystocentesis</li> <li>- Contraindicated if</li> </ul> | <ul style="list-style-type: none"> <li>- Direct visualization of the biliary tree and pancreas</li> <li>- No ability for therapeutic interventions</li> <li>- Can safely obtain bile by cholecystocentesis</li> </ul> | <ul style="list-style-type: none"> <li>- Direct visualization of the biliary tree and pancreas</li> <li>- Ability for therapeutic interventions</li> <li>- Can safely obtain bile or gallbladder</li> </ul> |

|  |                                                 |  |             |
|--|-------------------------------------------------|--|-------------|
|  | suspected extrahepatic<br>bile duct obstruction |  | wall biopsy |
|--|-------------------------------------------------|--|-------------|

BP= blood pressure, CRT= capillary refill time, HR= heart rate, PCV= packed cell volume, RR= respiratory rate, TS= total solids.

**Supplemental Table 3: Summary of studies looking at survival in dogs with chronic hepatitis**

| <b>Histopathologic<br/>Diagnosis</b> | <b>Breed</b> | <b>Study<br/>Population</b> | <b>Survival time<br/>Days</b> | <b>Reference</b>                                                              |
|--------------------------------------|--------------|-----------------------------|-------------------------------|-------------------------------------------------------------------------------|
| Chronic hepatitis                    | Mixed        | n=97*                       | 541 (21-1323)                 | Strombeck<br><br>1977-1985 (163)                                              |
| Chronic hepatitis                    | Mixed        | n=20                        | 630 (1-2610)                  | Sevelius<br><br>1987-1994<br><br>Excludes dogs<br>with cirrhosis<br><br>(169) |
| Chronic hepatitis                    | Labrador     | n=24                        | 374 (1-2645)                  | Shih<br><br>2000-2005                                                         |

|                   |                             |      |                |                                              |
|-------------------|-----------------------------|------|----------------|----------------------------------------------|
|                   |                             |      |                | (167)                                        |
| Chronic hepatitis | American<br>Cocker Spaniel  | n=13 | 913 (63-1981)  | Kanemoto<br><br>2003-2009<br><br>(164)       |
| Chronic hepatitis | English Springer<br>Spaniel | n=68 | 189 (1-1211)   | Bexfield<br><br>2006-2010<br><br>(160)       |
| Chronic hepatitis | Mixed                       | n=39 | 197 (1-2677)   | Gomez-Selgas<br><br>1999-2010<br><br>(175)   |
| Chronic hepatitis | Mixed                       | n=20 | 729 (342-1113) | Raffan<br><br>1996-2005<br><br>Excludes dogs |

|                   |       |      |               |                                                                               |
|-------------------|-------|------|---------------|-------------------------------------------------------------------------------|
|                   |       |      |               | with ascites<br>(176)                                                         |
| Chronic hepatitis | Mixed | n=43 | 549 (0-1470)  | Poldervaart<br><br>2002-2006<br><br>Idiopathic CH<br><br>(90)                 |
| Chronic hepatitis | Mixed | n=23 | 507 (204-810) | Poldervaart et al<br><br>2002-2006<br><br>Copper<br>associated CH<br><br>(90) |
| Chronic hepatitis | Mixed | n=17 | 990           | Favier *<br><br>excluding dogs                                                |

|                   |           |      |            |                                                                          |
|-------------------|-----------|------|------------|--------------------------------------------------------------------------|
|                   |           |      |            | with cirrhosis<br>(approximately<br>600 days with<br>cirrhotics<br>(165) |
| Chronic hepatitis | Dobermans | n=16 | 44 (2-284) | Speeti***<br><br>Survival after<br>onset of clinical<br>signs<br>(156)   |
| Cirrhosis         | Mixed     | n=20 | < 7 (0-60) | Sevelius<br><br>1997-1984<br>(169)                                       |

|                                    |       |      |             |                                         |
|------------------------------------|-------|------|-------------|-----------------------------------------|
| Cirrhosis                          | Mixed | n=19 | 39          | Favier<br><br>(165)                     |
| Ascites                            | Mixed | n=7  | 32          | James<br><br>(184)                      |
| Ascites                            | Mixed | n=14 | 12          | Raffan<br><br>(176)                     |
| Lobular<br>Dissecting<br>Hepatitis | Mixed | n=7  | 21 (12-810) | Poldevaart<br><br>2002-2006<br><br>(90) |
| Lobular<br>Dissecting<br>Hepatitis | Mixed | n=6  | 75 (0-150)  | Bennett<br><br>1983<br><br>(178)        |

**Supplemental Table 4: Prognostic Factors in chronic hepatitis in dogs**

| Category  | Predictive Factors | REF                                                       | Finding                                                                                |
|-----------|--------------------|-----------------------------------------------------------|----------------------------------------------------------------------------------------|
| Clinical  | Anemia             | Kilpatrick (187)                                          | Shorter overall survival                                                               |
| Pathology |                    |                                                           |                                                                                        |
|           | Thrombocytopenia   | Shih (167)                                                | Survival less than 2 months                                                            |
|           | Hyperbilirubinemia | Gomez-Selgas (175)<br>Poldevaart (90)<br>Kilpatrick (187) | Shorter overall survival<br>Shorter overall survival*<br>Shorter overall survival      |
|           | Hypoalbuminemia    | Strombeck (163)<br>Poldervaart (90)                       | Shorter overall survival<br>Shorter overall survival*                                  |
|           | Increased PT       | Strombeck (163)<br>Shih (166)<br>Poldevaart (90)          | Predicted death within 1 wk<br>Survival less than 2 months<br>Shorter overall survival |
|           | Increased aPTT     | Strombeck (163)<br>Shih (167)<br>Poldevaart (90)          | Predicted death within 1 wk<br>Shorter overall survival<br>Shortened overall survival* |
|           | Low glucose        | Strombeck (163)                                           | Predicted death within 1 wk                                                            |



|                 |                             |                                        |                                                                            |
|-----------------|-----------------------------|----------------------------------------|----------------------------------------------------------------------------|
|                 | Hypoglobulinemia            | Sevelius (169)<br><br>Shih (167)       | Shorter overall survival (alpha globulins)<br><br>Shorter overall survival |
| Histopathology  | Severity of fibrosis        | Strombeck (163)<br><br>Poldevaart (90) | Predicted death within 1 wk<br><br>Shorter overall survival                |
|                 | Degree of necrosis          | Strombeck (163)                        | Predicted death within 1 wk                                                |
|                 | Bridging fibrosis           | Strombeck (163)                        | Shorter overall survival                                                   |
|                 | Marked fibrosis             | Hoffmann (abstract)*                   | Shorter overall survival                                                   |
| Imaging         | Ascites                     | Raffan (176)<br><br>Poldevart (90)     | Shorter overall survival<br><br>Shorter overall survival*                  |
|                 | Small liver on US           | Poldevaart (90)                        | Shorter overall survival                                                   |
|                 | Enlarged portal lymph nodes | Poldevaart (90)                        | Shorter overall survival                                                   |
| Clinical Scores | SIRS                        | Kilpatrick (187)                       | Shorter overall survival                                                   |
|                 | Clinical Score              | Shih (167)                             | Shorter overall survival                                                   |

\*Hoffman AR, Gold RM, Sucholdolski JS,

Steiner JM, Lidbury JA. Hepatic Fibrosis is Associated with Shortened Survival Times in Dogs with Chronic Hepatitis. ACVIM 2017, National Harbor, MD

**Supplemental Table 5: Treatment of complications of chronic hepatitis in dogs**

| <b>Complication</b> | <b>Therapeutic Approach</b>                                                                                           | <b>Dose/Modulation</b>                                                                                                                                                               | <b>Side Effects</b>                                                                                                                                                                                  |
|---------------------|-----------------------------------------------------------------------------------------------------------------------|--------------------------------------------------------------------------------------------------------------------------------------------------------------------------------------|------------------------------------------------------------------------------------------------------------------------------------------------------------------------------------------------------|
| Portal hypertension | Careful attention to volume status to avoid hypervolemia<br><br>No drugs shown to decrease portal pressure in the dog | NA                                                                                                                                                                                   | -NA                                                                                                                                                                                                  |
| Ascites             | Dietary Na restriction<br><br>Spironolactone<br><br>Furosemide<br><br>Paracentesis                                    | <0.05 g/100 kcal<br><br>1-2 mg/kg/day if no response in 7-10 days titrate dose up q 3-5 days to maximum of 4 mg/kg day<br><br>0.5-1.0 mg/kg/day<br><br>Remove 50% of ascitic volume* | -None<br><br>-Hyperkalemia<br>-Dehydration<br><br>-Hypovolemia<br>-Metabolic alkalosis<br>-Hypokalemia<br><br>-Hypovolemia and worsening of hypoalbuminemia especially with removal of large volumes |

|                        |                                                                                                                       |                                                                                                                                                                                                                                                                                                        |                                                                                                                                                                                                                                                                                     |
|------------------------|-----------------------------------------------------------------------------------------------------------------------|--------------------------------------------------------------------------------------------------------------------------------------------------------------------------------------------------------------------------------------------------------------------------------------------------------|-------------------------------------------------------------------------------------------------------------------------------------------------------------------------------------------------------------------------------------------------------------------------------------|
|                        |                                                                                                                       |                                                                                                                                                                                                                                                                                                        |                                                                                                                                                                                                                                                                                     |
| Hepatic Encephalopathy | <p>Dietary protein modulation</p> <p>Lactulose</p> <p>Metronidazole</p> <p>Neomycin</p> <p>Amoxicillin/ampicillin</p> | <p>&lt; 5g/100 kcal diet titrated to maximum tolerated amount<br/>High biologic value, highly digestible, soy, dairy and vegetable sources. Avoid red meat</p> <p>0.25-0.5 ml/kg PO q 8-12 hrs titrate to 2-3 soft stools a day</p> <p>7.5 mg/kg PO BID</p> <p>20 mg/kg PO BID</p> <p>10 mg/kg BID</p> | <p>-Hypoalbuminemia that worsens ascites<br/>-Muscle catabolism that worsens HE</p> <p>-Diarrhea<br/>-Flatulence<br/>-Abdominal cramps</p> <p>-Neurotoxicity (rare)<br/>-Cytopenia (rare)</p> <p>-Not recommended due to oto- and renal toxicity</p> <p>-Diarrhea<br/>-Vomiting</p> |
| Coagulation            | Severe prolongation of PT, aPTT (>1.5 X ULN) with                                                                     | Fresh frozen plasma (FFP) and/or use                                                                                                                                                                                                                                                                   | <p>-Prothrombotic<br/>-Proinflammatory</p>                                                                                                                                                                                                                                          |

|  |                                 |                                                                                                                                                                       |                                                 |
|--|---------------------------------|-----------------------------------------------------------------------------------------------------------------------------------------------------------------------|-------------------------------------------------|
|  | sign of bleeding                | whole blood if anemia<br>or overt signs of<br>hemorrhage 10-15<br>ml/kg IV                                                                                            | -Volume overload<br>-Immunological<br>reactions |
|  | Thrombocytopenia                | DDAVP 1-2 ug/kg<br>SubQ                                                                                                                                               |                                                 |
|  | Vitamin K deficiency            | 0.5 mg/kg SQ BID for<br>3 days then weekly                                                                                                                            | -Anaphylactic if<br>given IV                    |
|  | Hypofibrinogenemia              | FFP (above)<br>Cryoprecipitate<br>1 unit/10 kg IV                                                                                                                     |                                                 |
|  | Hyperfibrinolysis               | Aminocaproic acid<br>50-100 mg/kg IV or<br>15 mg/kg PO q 8                                                                                                            | -GI upset                                       |
|  | Evidence of acute<br>thrombosis | Clopidogrel 2 mg/kg<br>PO q 24<br><br>Enoxaparin 0.8 mg/kg<br>SQ q 8 hrs<br><br>Dalteparin<br>150 units SQ q 8 hrs<br><br>Rivaroxaban<br>Dose not well<br>established | -Bleeding                                       |

|                           |                                                                                                                                                               |                                                                                                                                          |                                                                                                                            |
|---------------------------|---------------------------------------------------------------------------------------------------------------------------------------------------------------|------------------------------------------------------------------------------------------------------------------------------------------|----------------------------------------------------------------------------------------------------------------------------|
| Infection                 | Ideally base antibiotic therapy on culture and sensitivity<br><br>Empiric choices:<br>Fluoroquinolone in combination with penicillin/beta lactamase inhibitor | Enrofloxacin 10 mg/kg PO/IV q 24 plus Clavulanic acid/amoxicillin 13.75 mg/kg PO q 12 hrs or Ampicillin/sulbactam 30 mg/kg IV q 8 hr     | -Vomiting<br>-Diarrhea                                                                                                     |
| Gastroduodenal ulceration | Omeprazole<br><br>Famotidine<br><br>Sucralfate<br><br>Avoid NSAID use                                                                                         | 1 mg/kg PO BID<br><br>1 mg/kg PO BID<br><br>¼- ½ of a 1 gram tablet (250 – 500 mg) for toy breed dogs; up to 1 gram per large dog PO TID | -Nausea, vomiting<br>-Acute kidney injury (humans)<br><br>-Rare<br><br>-Constipation<br>-Interference with drug absorption |

\*Removal of larger volume of ascitic fluid can, although rarely, precipitate decreased renal perfusion or due to depletion of albumin an oncotic emergency. For larger volume paracentesis, IV administration of crystalloids or colloids may be indicated.

DDAVP= desmopressin, FFP= fresh frozen plasma, NSAID = nonsteroidal anti-inflammatory agent
